# Supplementary material for: Expression of the senescence marker p16INK4a in skin biopsies of acute lymphoblastic leukemia survivors: a pilot study
Source: PubMed Central journal article supplement (PMC3827993; doi:10.1186/1748-717x-8-252), 2013-10-31
Supplement: 1748-717X-8-252-S1.pdf [file 1748-717X-8-252-S1.pdf]

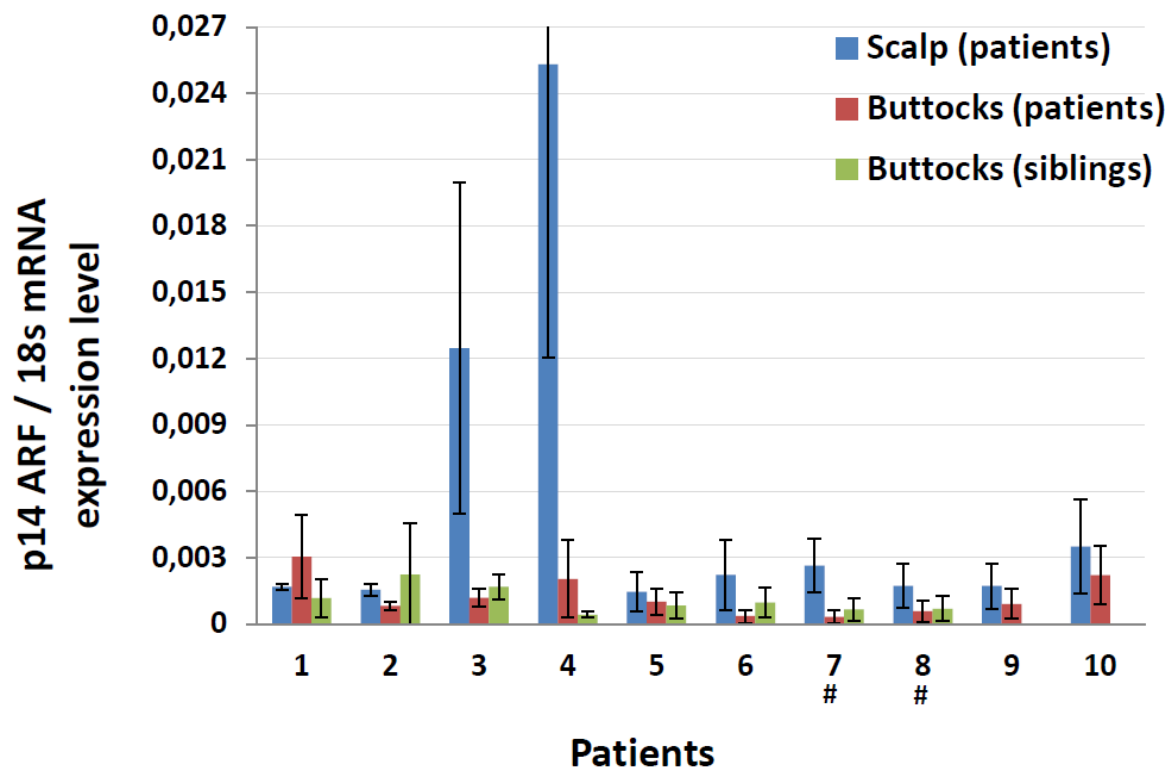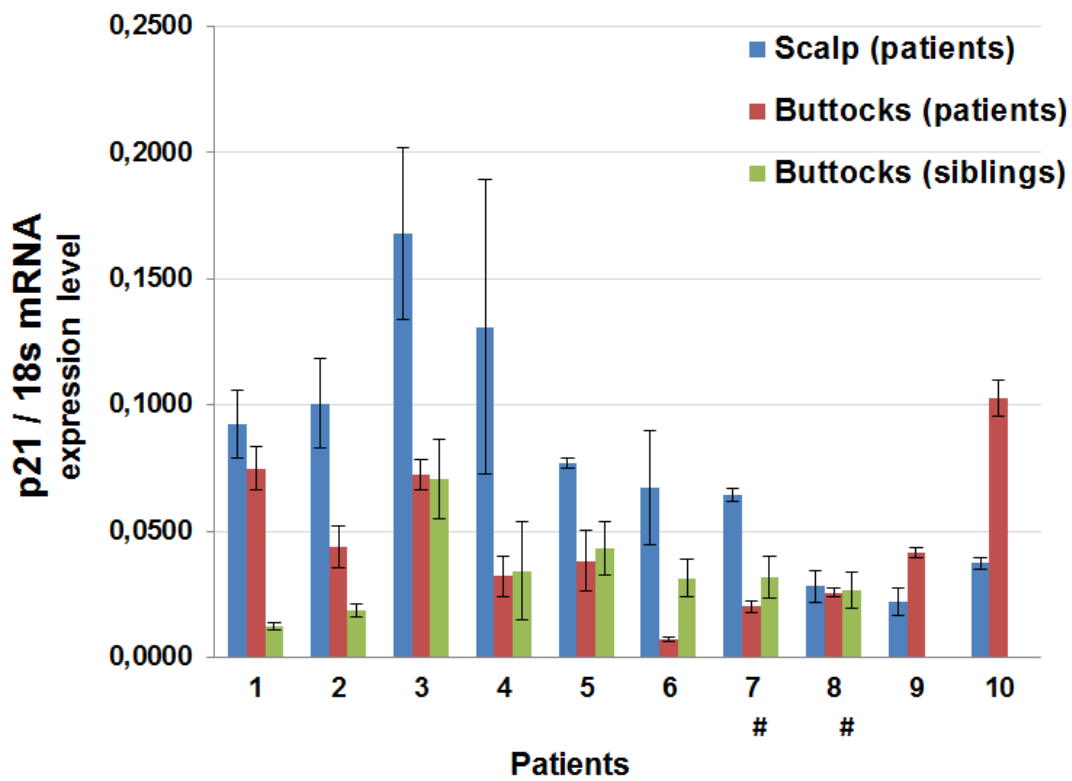

**FIGURE LEGEND**

**Figure S1:** p14<sup>ARF</sup> and p21 mRNA levels in irradiated compared to non-irradiated tissues. p14<sup>ARF</sup> and p21 mRNA were quantified by qPCR and were normalized using 18s mRNA expression level. qPCR was run four times independently for each biopsy. Error bars represent +/- 1 S.D. The average expression level for biopsies from patients' scalp was not found to be significantly higher than the average expression level for biopsies from the buttocks (n = 10 patients, paired t-test, p = 0.11 and p = 0.07 for p14<sup>ARF</sup> and p21 respectively). Primers used were : human p21 forward 5'-ggcagaccagcatgacagatt-3'; reverse 5'-gcggattagggttctctt-3' and human p14ARF forward 5'-ctgaggagccagcgtctag- 3'; reverse 5'-cccatcatcatgacctggtcttcta-3'.
